# Supplementary material for: Identification of Hub Genes Related to the Recovery Phase of Irradiation Injury by Microarray and Integrated Gene Network Analysis
Source: PLoS One. 2011 Sep 13;6(9):e24680. doi: 10.1371/journal.pone.0024680 (PMC3172286; doi:10.1371/journal.pone.0024680)
Supplement: Table S3 — The enrichment of Gene Ontology in each temporal expression pattern analyzed by STEM software. (XLS) [file pone.0024680.s004.xls]

## Sheet: Sheet1
Table S3. The enrichment of Gene Ontology in each temporal expression pattern analyzed by STEM software
Expression profile	profile 0			profile 5			Profile 8			profile 12			profile 13			profile 27			profile 34			profile 39
	Function category	p-value		Function category	p-value		Function category	p-value		Function category	p-value		Function category	p-value		Function category	p-value		Function category	p-value		Function category	p-value
cellular component orgnization	chromatin assembly	5.5e-14	protein modification	macromolecule modification	0.0076	immune response	regulation of myeloid cell differentiation	5.7e-05	matabolic process	carbohydrate metabolic process	0.0088	homeostatic process	homeostatic process	2.9e-06	nervous system development	neuron differentiation	0.00056	biological regulation	regulation of body fluid levels	0.0031	immune response	antigen processing and presentation	0.0036
	nucleosome assembly	5.5e-14		protein phosphorylation	0.01		myeloid cell differentiation	7.4e-05		proteolysis	0.02		regulation of biological quality	0.00011		generation of neurons	0.0012	localization	establishment of protein localization	0.03		immune response	0.03
	nucleosome organization	5.5e-14		protein modification process	0.02		megakaryocyte differentiation	0.00013		catabolic process	0.02		cellular homeostasis	0.0004		neurogenesis	0.0023		protein transport	0.03		immune effector process	0.03
	protein-DNA complex assembly	5.5e-14		phosphorylation	0.04		regulation of megakaryocyte differentiation	0.00013					chemical homeostasis	0.0021		neuron development	0.0037		protein localization	0.04		innate immune response	0.0091
	protein-DNA complex subunit organization	5.5e-14	metabolic process	cellular macromolecule metabolic process	0.01		negative regulation of megakaryocyte differentiation	0.00013					cellular chemical homeostasis	0.006		cell development	0.0046				response to stimulus	regulation of response to stress	0.02
	DNA conformation change	1e-13		macromolecule metabolic process	0.01		negative regulation of myeloid cell differentiation	0.00051					cellular ion homeostasis	0.006		nervous system development	0.005					response to other organism	0.02
	DNA packaging	1e-13		primary metabolic process	0.02		hemopoietic or lymphoid organ development	0.001					ion homeostasis	0.006		system development	0.03					defense response	0.04
	chromatin assembly or disassembly	1.8e-13		positive regulation of cellular metabolic process	0.03		hemopoiesis	0.001					ion transport	0.006	matabolic process	translation	0.0031					regulation of defense response	0.0044
	cellular macromolecular complex assembly	2.4e-12		regulation of metabolic process	0.04		immune system development	0.0012					establishment of localization	0.04		macromolecule biosynthetic process	0.01					response to biotic stimulus	0.0046
	cellular macromolecular complex subunit organization	1.4e-11		cellular metabolic process	0.05		regulation of immune system process	0.02					transport	0.04		cellular macromolecule biosynthetic process	0.02
	chromatin organization	2.1e-11		positive regulation of metabolic process	0.05	response to stimulus	cellular response to organic substance	0.0059				immune response	myeloid cell differentiation	0.01		biosynthetic process	0.04
	chromosome organization	4.6e-11	immune response	lymphocyte activation	0.01		response to drug	0.0059					hemopoietic or lymphoid organ development	0.03	immune response	leukocyte activation	0.02
	cellular component assembly at cellular level	6.7e-11		leukocyte activation	0.03		cellular response to chemical stimulus	0.02					hemopoiesis	0.03		cell activation	0.04
	macromolecular complex assembly	9.9e-10					cellular response to stimulus	0.03					immune system development	0.04	response to stimulus	cell activation	0.02
	macromolecular complex subunit organization	3.2e-09					response to organic substance	0.04								taxis	0.03
	cellular component assembly	9.2e-09					cellular response to stress	0.05								chemotaxis	0.03
	cellular component biogenesis	9.2e-09					response to endogenous stimulus	0.05
	organelle organization	2.1e-07				cellular component orgnization	cellular macromolecular complex subunit organization	1.7e-06
	cellular component organization at cellular level	3.4e-06					cellular macromolecular complex assembly	4.8e-06
	cellular component organization or biogenesis at cellular level	3.4e-06					cellular component assembly at cellular level	3e-05
	cellular component organization	0.00057					chromatin assembly	4.6e-05
	regulation of multicellular organismal development	0.04					protein-DNA complex assembly	4.6e-05
immune response	negative regulation of myeloid cell differentiation	3.9e-05					nucleosome organization	4.6e-05
	megakaryocyte differentiation	0.00013					nucleosome assembly	4.6e-05
	negative regulation of megakaryocyte differentiation	0.00013					protein-DNA complex subunit organization	4.6e-05
	regulation of megakaryocyte differentiation	0.00013					macromolecular complex subunit organization	4.9e-05
	regulation of myeloid cell differentiation	0.00052					DNA packaging	5.9e-05
	negative regulation of cell differentiation	0.00067					DNA conformation change	5.9e-05
	negative regulation of developmental process	0.0018					chromatin assembly or disassembly	7.5e-05
	myeloid cell differentiation	0.0033					macromolecular complex assembly	0.00013
	regulation of cell differentiation	0.02					cellular component assembly	0.00044
	regulation of developmental process	0.03					cellular component biogenesis	0.00044
	regulation of multicellular organismal development	0.04					chromatin organization	0.00053
	hemopoiesis	0.05					organelle organization	0.00064
	hemopoietic or lymphoid organ development	0.05					chromosome organization	0.00074
	immune system development	0.05					cellular component organization or biogenesis at cellular level	0.001
							cellular component organization at cellular level	0.001
							cellular component organization	0.0047
						metabolic process	positive regulation of nitrogen compound metabolic process	0.0002
							positive regulation of nucleobase, nucleoside, nucleotide and nucleic acid metabolic process	0.00067
							positive regulation of cellular biosynthetic process	0.00083
							positive regulation of biosynthetic process	0.00098
							positive regulation of macromolecule biosynthetic process	0.0021
							positive regulation of RNA metabolic process	0.0059
							nucleic acid metabolic process	0.0066
							positive regulation of cellular metabolic process	0.01
							regulation of nitrogen compound metabolic process	0.01
							RNA metabolic process	0.01
							RNA biosynthetic process	0.01
							regulation of cellular biosynthetic process	0.01
							regulation of RNA metabolic process	0.01
							regulation of biosynthetic process	0.01
						gene expression	cellular nitrogen compound metabolic process	0.02
							nucleobase, nucleoside, nucleotide and nucleic acid metabolic process	0.02
							positive regulation of metabolic process	0.02
							regulation of cellular macromolecule biosynthetic process	0.02
							regulation of macromolecule biosynthetic process	0.02
							regulation of nucleobase, nucleoside, nucleotide and nucleic acid metabolic process	0.02
							positive regulation of macromolecule metabolic process	0.03
							cellular macromolecule biosynthetic process	0.05
							nitrogen compound metabolic process	0.05
							positive regulation of transcription	0.00033
							transcription from RNA polymerase II promoter	0.001
							positive regulation of gene expression	0.0012
							positive regulation of transcription from RNA polymerase II promoter	0.0024
							regulation of transcription from RNA polymerase II promoter	0.0047
							positive regulation of transcription, DNA-dependent	0.0048
							regulation of transcription	0.0099
							transcription	0.0099
							regulation of transcription, DNA-dependent	0.01
							transcription, DNA-dependent	0.01
							regulation of gene expression	0.03
