# Supplementary material for: Identification of Hub Genes Related to the Recovery Phase of Irradiation Injury by Microarray and Integrated Gene Network Analysis
Source: PLoS One. 2011 Sep 13;6(9):e24680. doi: 10.1371/journal.pone.0024680 (PMC3172286; doi:10.1371/journal.pone.0024680)
Supplement: Table S5 — The classification of functional categories. (XLS) [file pone.0024680.s006.xls]

## Sheet: Sheet1
Table S5. The classification of functional categories
GO category	P-value	FDR	enrichment	GO diffgene count	GO gene count	GO ID
response to stimulus
response to drug	2.22865e-16	5.9904e-15	39.3179	12	34	GO:0042493
response to cytokine stimulus	9.04554e-15	1.82352e-13	111.401	7	7	GO:0034097
response to lipopolysaccharide	5.19764e-11	8.38248e-10	37.1336	8	24	GO:0032496
response to ethanol	6.27039e-09	6.32034e-08	69.6255	5	8	GO:0045471
response to virus	1.11207e-06	7.17109e-06	14.4408	7	54	GO:0009615
defense response to Gram-positive bacterium	8.61344e-06	3.57154e-05	34.2771	4	13	GO:0050830
response to light stimulus	1.4197e-05	5.37862e-05	66.8404	3	5	GO:0009416
cellular response to insulin stimulus	7.79189e-05	0.000216535	41.7753	3	8	GO:0032869
response to glucose stimulus	0.000164746	0.000340632	33.4202	3	10	GO:0009749
negative regulation of inflammatory response	0.000225013	0.000426341	30.382	3	11	GO:0050728
cell redox homeostasis	0.00029983	0.000514674	9.94649	5	56	GO:0045454
chondroitin sulfate biosynthetic process	0.000479734	0.000671617	74.2671	2	3	GO:0030206
base-excision repair	0.000486526	0.000676417	23.8716	3	14	GO:0006284
endoplasmic reticulum unfolded protein response	0.000604105	0.000800406	22.2801	3	15	GO:0030968
response to insulin stimulus	0.00095375	0.00110869	55.7004	2	4	GO:0032868
response to estrogen stimulus	0.00095375	0.00110869	55.7004	2	4	GO:0043627
chemotaxis	0.00197308	0.00189474	6.631	5	84	GO:0006935
response to stress	0.0028239	0.00244557	6.12092	5	91	GO:0006950
inflammatory response	0.00322545	0.00266964	4.84351	6	138	GO:0006954
response to calcium ion	0.00434589	0.00333123	27.8502	2	8	GO:0051592
response to hydrogen peroxide	0.00434589	0.00333123	27.8502	2	8	GO:0042542
response to hypoxia	0.00642587	0.00434589	10.1273	3	33	GO:0001666
response to cold	0.00838555	0.00510516	20.2547	2	11	GO:0009409
defense response to virus	0.0100031	0.00562636	18.5668	2	12	GO:0051607
response to protein stimulus	0.0117518	0.00610737	17.1386	2	13	GO:0051789
defense response to bacterium	0.014672	0.00676592	5.24239	4	85	GO:0042742
response to iron ion	0.0179532	0.00734872	111.401	1	1	GO:0010039
response to testosterone stimulus	0.0179532	0.00734872	111.401	1	1	GO:0033574
cellular response to oxidative stress	0.0179532	0.00734872	111.401	1	1	GO:0034599
response to gravity	0.0179532	0.00734872	111.401	1	1	GO:0009629
response to oxygen radical	0.0179532	0.00734872	111.401	1	1	GO:0000305
xenobiotic catabolic process	0.0179532	0.00734872	111.401	1	1	GO:0042178
hyperosmotic salinity response	0.0179532	0.00734872	111.401	1	1	GO:0042538
hyperosmotic salinity response	0.0179532	0.00734872	111.401	1	1	GO:0042538
wound healing	0.0200104	0.00789278	13.106	2	17	GO:0042060
response to oxidative stress	0.0217787	0.00832973	6.55298	3	51	GO:0006979
response to gamma radiation	0.022379	0.00847211	12.3779	2	18	GO:0010332
sensory perception of pain	0.0274645	0.0095711	11.1401	2	20	GO:0019233
response to starvation	0.0357455	0.0110297	55.7004	1	2	GO:0042594
response to electrical stimulus	0.0357455	0.0110297	55.7004	1	2	GO:0051602
regulation of response to osmotic stress	0.0357455	0.0110297	55.7004	1	2	GO:0047484
sleep	0.0357455	0.0110297	55.7004	1	2	GO:0030431
positive regulation of stress-activated MAPK cascade	0.0357455	0.0110297	55.7004	1	2	GO:0032874
response to toxin	0.03593	0.0110584	9.68702	2	23	GO:0009636
immune system process
immune response	3.05066e-09	3.51425e-08	5.75167	19	368	GO:0006955
neutrophil chemotaxis	1.38849e-07	1.24405e-06	42.8464	5	13	GO:0030593
positive regulation of T cell mediated cytotoxicity	1.56188e-06	9.06472e-06	49.5114	4	9	GO:0001916
antigen processing and presentation	1.59618e-06	9.1937e-06	10.8684	8	82	GO:0019882
B cell receptor signaling pathway	8.61344e-06	3.57154e-05	34.2771	4	13	GO:0050853
natural killer cell activation	2.82041e-05	9.76059e-05	55.7004	3	6	GO:0030101
innate immune response	0.000151377	0.000325833	8.56929	6	78	GO:0045087
B cell costimulation	0.00016087	0.000336464	111.401	2	2	GO:0031296
positive regulation of germinal center formation	0.000479734	0.000671617	74.2671	2	3	GO:0002636
positive regulation of natural killer cell activation	0.000479734	0.000671617	74.2671	2	3	GO:0032816
antigen processing and presentation of exogenous peptide antigen via MHC class I	0.000479734	0.000671617	74.2671	2	3	GO:0042590
cellular extravasation	0.00095375	0.00110869	55.7004	2	4	GO:0045123
regulation of immune response	0.00106191	0.0011893	18.5668	3	18	GO:0050776
T cell differentiation	0.00106191	0.0011893	18.5668	3	18	GO:0030217
positive regulation of phagocytosis	0.00125263	0.0013521	17.5896	3	19	GO:0050766
positive regulation of T cell proliferation	0.00169651	0.00168892	15.9144	3	21	GO:0042102
positive regulation of natural killer cell mediated cytotoxicity	0.00235608	0.00215685	37.1336	2	6	GO:0045954
immunoglobulin secretion	0.00235608	0.00215685	37.1336	2	6	GO:0048305
activated T cell proliferation	0.0032789	0.00269797	31.8288	2	7	GO:0050798
positive regulation of T cell activation	0.0055544	0.00395135	24.7557	2	9	GO:0050870
T cell costimulation	0.0055544	0.00395135	24.7557	2	9	GO:0031295
mast cell activation	0.0055544	0.00395135	24.7557	2	9	GO:0045576
B cell homeostasis	0.0100031	0.00562636	18.5668	2	12	GO:0001782
negative regulation of activation of membrane attack complex	0.0179532	0.00734872	111.401	1	1	GO:0001971
regulation of MHC class I biosynthetic process	0.0179532	0.00734872	111.401	1	1	GO:0045343
positive regulation of B cell receptor signaling pathway	0.0179532	0.00734872	111.401	1	1	GO:0050861
positive regulation of natural killer cell mediated cytotoxicity directed against tumor cell target	0.0179532	0.00734872	111.401	1	1	GO:0002860
mature B cell differentiation	0.0179532	0.00734872	111.401	1	1	GO:0002335
antigen processing and presentation of endogenous peptide antigen via MHC class Ib	0.0179532	0.00734872	111.401	1	1	GO:0002476
negative regulation of megakaryocyte differentiation	0.0179532	0.00734872	111.401	1	1	GO:0045653
B cell activation	0.0200104	0.00789278	13.106	2	17	GO:0042113
T cell activation	0.0200104	0.00789278	13.106	2	17	GO:0042110
positive regulation of B cell proliferation	0.022379	0.00847211	12.3779	2	18	GO:0030890
antigen processing and presentation of peptide antigen via MHC class I	0.0274645	0.0095711	11.1401	2	20	GO:0002474
stimulatory C-type lectin receptor signaling pathway	0.0357455	0.0110297	55.7004	1	2	GO:0002223
protection from natural killer cell mediated cytotoxicity	0.0357455	0.0110297	55.7004	1	2	GO:0042270
T-helper 1 cell differentiation	0.0357455	0.0110297	55.7004	1	2	GO:0045063
regulation of macrophage activation	0.0357455	0.0110297	55.7004	1	2	GO:0043030
positive regulation of monocyte differentiation	0.0357455	0.0110297	55.7004	1	2	GO:0045657
B cell differentiation	0.0486888	0.0127747	8.25191	2	27	GO:0030183
Hematopoietic system
negative regulation of osteoblast differentiation	0.000116097	0.000280238	37.1336	3	9	GO:0045668
osteoblast development	0.0055544	0.00395135	24.7557	2	9	GO:0002076
hemopoiesis	0.0154377	0.00691475	7.42671	3	45	GO:0030097
myeloid cell differentiation	0.0156333	0.00695139	14.8534	2	15	GO:0030099
negative regulation of blood coagulation	0.0179532	0.00734872	111.401	1	1	GO:0030195
positive regulation of blood coagulation	0.0179532	0.00734872	111.401	1	1	GO:0030194
regulation of osteoblast differentiation	0.0179532	0.00734872	111.401	1	1	GO:0045667
negative regulation of osteoblast proliferation	0.0179532	0.00734872	111.401	1	1	GO:0033689
myelination	0.0486888	0.0127747	8.25191	2	27	GO:0042552
localization
transmembrane transport	4.0695e-19	1.64077e-17	92.8339	10	12	GO:0055085
SMAD protein nuclear translocation	5.71707e-06	2.66315e-05	83.5505	3	4	GO:0007184
transport	7.93404e-05	0.00021925	0.135524	2	1644	GO:0006810
glucose import	0.0179532	0.00734872	111.401	1	1	GO:0046323
regulation of glutamate secretion	0.0179532	0.00734872	111.401	1	1	GO:0014048
epinephrine secretion	0.0179532	0.00734872	111.401	1	1	GO:0048242
carbon dioxide transport	0.0357455	0.0110297	55.7004	1	2	GO:0015670
positive regulation of calcium ion transport	0.0357455	0.0110297	55.7004	1	2	GO:0051928
brain and nervous system development
brain development	0.00104053	0.00117384	7.63019	5	73	GO:0007420
regulation of neuron differentiation	0.0032789	0.00269797	31.8288	2	7	GO:0045664
neuron migration	0.00474899	0.00354849	7.18714	4	62	GO:0001764
nervous system development	0.011923	0.00615055	3.71336	6	180	GO:0007399
cranial nerve development	0.0179532	0.00734872	111.401	1	1	GO:0021545
rhombomere 3 formation	0.0179532	0.00734872	111.401	1	1	GO:0021660
rhombomere 5 formation	0.0179532	0.00734872	111.401	1	1	GO:0021666
microglial cell activation	0.0179532	0.00734872	111.401	1	1	GO:0001774
axonogenesis	0.0267251	0.00942229	6.0764	3	55	GO:0007409
lateral ventricle development	0.0357455	0.0110297	55.7004	1	2	GO:0021670
neuron development	0.0421063	0.0119577	8.91206	2	25	GO:0048666
biosynthetic process
positive regulation of nitric oxide biosynthetic process	0.000116097	0.000280238	37.1336	3	9	GO:0045429
positive regulation of tumor necrosis factor biosynthetic process	0.00095375	0.00110869	55.7004	2	4	GO:0042535
porphyrin biosynthetic process	0.00434589	0.00333123	27.8502	2	8	GO:0006779
heme biosynthetic process	0.00838555	0.00510516	20.2547	2	11	GO:0006783
regulation of acyl-CoA biosynthetic process	0.0179532	0.00734872	111.401	1	1	GO:0050812
collagen biosynthetic process	0.0179532	0.00734872	111.401	1	1	GO:0032964
dermatan sulfate biosynthetic process	0.0357455	0.0110297	55.7004	1	2	GO:0030208
positive regulation of cholesterol biosynthetic process	0.0357455	0.0110297	55.7004	1	2	GO:0045542
branched chain family amino acid biosynthetic process	0.0357455	0.0110297	55.7004	1	2	GO:0009082
positive regulation of cGMP biosynthetic process	0.0357455	0.0110297	55.7004	1	2	GO:0030828
catabolic process
RNA catabolic process	0.0179532	0.00734872	111.401	1	1	GO:0006401
cAMP catabolic process	0.0179532	0.00734872	111.401	1	1	GO:0006198
cGMP catabolic process	0.0179532	0.00734872	111.401	1	1	GO:0046069
chitin catabolic process	0.00690181	0.00454537	22.2801	2	10	GO:0006032
cyclic nucleotide catabolic process	0.0179532	0.00734872	111.401	1	1	GO:0009214
glycosaminoglycan catabolic process	0.0179532	0.00734872	111.401	1	1	GO:0006027
mRNA catabolic process	0.0055544	0.00395135	24.7557	2	9	GO:0006402
nucleotide catabolic process	0.00158012	0.00160577	44.5603	2	5	GO:0009166
regulation of cAMP metabolic process	0.0179532	0.00734872	111.401	1	1	GO:0030814
uridine metabolic process	0.0179532	0.00734872	111.401	1	1	GO:0046108
carbohydrate metabolic process	0.0113057	0.00599176	3.75508	6	178	GO:0005975
neutral lipid metabolic process	0.0357455	0.0110297	55.7004	1	2	GO:0006638
phosphate metabolic process	0.0357455	0.0110297	55.7004	1	2	GO:0006796
pyrimidine nucleotide metabolic process	0.0179532	0.00734872	111.401	1	1	GO:0006220
positive regulation of GTPase activity	0.0357455	0.0110297	55.7004	1	2	GO:0043547
positive regulation of ATPase activity	0.0357455	0.0110297	55.7004	1	2	GO:0032781
gene expression
regulation of transcription	1.68902e-05	6.19081e-05	3.74456	16	476	GO:0045449
negative regulation of NF-kappaB transcription factor activity	4.9027e-05	0.000153859	47.7432	3	7	GO:0032088
negative regulation of NF-kappaB transcription factor activity	4.9027e-05	0.000153859	47.7432	3	7	GO:0032088
protein destabilization	0.00016087	0.000336464	111.401	2	2	GO:0031648
positive regulation of transcription	0.000296165	0.000510736	7.5955	6	88	GO:0045941
protein stabilization	0.000384836	0.000596823	25.7079	3	13	GO:0050821
negative regulation of transcription factor activity	0.000479734	0.000671617	74.2671	2	3	GO:0043433
positive regulation of transcription factor activity	0.00158012	0.00160577	44.5603	2	5	GO:0051091
negative regulation of transcription from RNA polymerase II promoter	0.00361113	0.00290491	4.08275	7	191	GO:0000122
positive regulation of transcription from RNA polymerase II promoter	0.0115449	0.00605431	3.00069	8	297	GO:0045944
negative regulation of CREB transcription factor activity	0.0179532	0.00734872	111.401	1	1	GO:0032792
mRNA transcription from RNA polymerase II promoter	0.0179532	0.00734872	111.401	1	1	GO:0042789
positive regulation of NF-kappaB transcription factor activity	0.0200104	0.00789278	13.106	2	17	GO:0051092
protein modification and degradation
protein amino acid autophosphorylation	0.000128661	0.000297692	11.8511	5	47	GO:0046777
positive regulation of cyclin-dependent protein kinase activity	0.00016087	0.000336464	111.401	2	2	GO:0045737
protein amino acid phosphorylation	0.000443381	0.000644752	2.95754	15	565	GO:0006468
positive regulation of proteasomal ubiquitin-dependent protein catabolic process	0.000479734	0.000671617	74.2671	2	3	GO:0032436
positive regulation of protein amino acid phosphorylation	0.000604105	0.000800406	22.2801	3	15	GO:0001934
negative regulation of protein kinase activity	0.00169651	0.00168892	15.9144	3	21	GO:0006469
positive regulation of protein ubiquitination	0.00235608	0.00215685	37.1336	2	6	GO:0031398
proteolysis	0.0111357	0.00594647	2.48058	11	494	GO:0006508
protein modification by small protein conjugation	0.0179532	0.00734872	111.401	1	1	GO:0032446
tyrosine phosphorylation of STAT protein	0.0179532	0.00734872	111.401	1	1	GO:0007260
positive regulation of ubiquitin-protein ligase activity	0.0179532	0.00734872	111.401	1	1	GO:0051443
peptidyl-serine phosphorylation	0.0200104	0.00789278	13.106	2	17	GO:0018105
protein amino acid ADP-ribosylation	0.0200104	0.00789278	13.106	2	17	GO:0006471
negative regulation of protein amino acid autophosphorylation	0.0357455	0.0110297	55.7004	1	2	GO:0031953
positive regulation of protein modification process	0.0357455	0.0110297	55.7004	1	2	GO:0031401
protein folding	0.0442247	0.0122349	3.7763	4	118	GO:0006457
signaling pathway and cell communication
positive regulation of I-kappaB kinase/NF-kappaB cascade	5.55248e-05	0.000169327	22.2801	4	20	GO:0043123
activation of MAPKK activity	0.000116097	0.000280238	37.1336	3	9	GO:0000186
G-protein coupled receptor protein signaling pathway	0.00041561	0.000622784	0.240997	4	1849	GO:0007186
hepatocyte growth factor receptor signaling pathway	0.000479734	0.000671617	74.2671	2	3	GO:0048012
positive regulation of MAPKKK cascade	0.00146388	0.00151921	16.7101	3	20	GO:0043410
regulation of neuronal synaptic plasticity	0.00434589	0.00333123	27.8502	2	8	GO:0048168
small GTPase mediated signal transduction	0.00646184	0.00436134	3.67833	7	212	GO:0007264
transforming growth factor beta receptor signaling pathway	0.00760696	0.00482239	9.54863	3	35	GO:0007179
regulation of long-term neuronal synaptic plasticity	0.0117518	0.00610737	17.1386	2	13	GO:0048169
positive regulation of protein kinase B signaling cascade	0.0179532	0.00734872	111.401	1	1	GO:0051897
receptor guanylyl cyclase signaling pathway	0.0179532	0.00734872	111.401	1	1	GO:0007168
desensitization of G-protein coupled receptor protein signaling pathway by arrestin	0.0179532	0.00734872	111.401	1	1	GO:0002032
Rap protein signal transduction	0.0179532	0.00734872	111.401	1	1	GO:0032486
long-term synaptic potentiation	0.0179532	0.00734872	111.401	1	1	GO:0060291
positive regulation of neurotransmitter secretion	0.0179532	0.00734872	111.401	1	1	GO:0001956
negative regulation of vascular endothelial growth factor receptor signaling pathway	0.0357455	0.0110297	55.7004	1	2	GO:0030948
positive regulation of synaptic transmission	0.0357455	0.0110297	55.7004	1	2	GO:0050806
positive regulation of JAK-STAT cascade	0.0357455	0.0110297	55.7004	1	2	GO:0046427
positive regulation of phosphoinositide 3-kinase cascade	0.0357455	0.0110297	55.7004	1	2	GO:0014068
cellular component organization
nucleosome assembly	8.67669e-20	6.99665e-18	19.374	20	115	GO:0006334
negative regulation of cell growth	0.000164168	0.000340017	17.1386	4	26	GO:0030308
negative regulation of microtubule depolymerization	0.0100031	0.00562636	18.5668	2	12	GO:0007026
protein complex assembly	0.0117518	0.00610737	17.1386	2	13	GO:0006461
chromatin modification	0.0162407	0.0070619	4.06572	5	137	GO:0016568
cellular protein complex assembly	0.0179532	0.00734872	111.401	1	1	GO:0043623
multicellular organism growth	0.0274645	0.0095711	11.1401	2	20	GO:0035264
actin filament organization	0.0421063	0.0119577	8.91206	2	25	GO:0007015
protein homooligomerization	0.0453478	0.0123762	8.56929	2	26	GO:0051260
cell cycle
regulation of cell cycle	7.03484e-06	3.10276e-05	14.5305	6	46	GO:0051726
cell cycle	0.00503985	0.00369857	2.75993	11	444	GO:0007049
cell cycle arrest	0.00305009	0.00257428	8.10187	4	55	GO:0007050
cell proliferation
negative regulation of cell proliferation	3.0092e-07	2.42653e-06	9.28339	10	120	GO:0008285
negative regulation of smooth muscle cell proliferation	0.00016087	0.000336464	111.401	2	2	GO:0048662
positive regulation of cell proliferation	0.000444912	0.000645925	5.81944	7	134	GO:0008284
cell death
negative regulation of apoptosis	0.000735085	0.000925485	6.42696	6	104	GO:0043066
positive regulation of anti-apoptosis	0.00095375	0.00110869	55.7004	2	4	GO:0045768
cytolysis	0.00222913	0.00207273	14.5305	3	23	GO:0019835
negative regulation of caspase activity	0.0032789	0.00269797	31.8288	2	7	GO:0043154
death	0.0100031	0.00562636	18.5668	2	12	GO:0016265
FasL biosynthetic process	0.0179532	0.00734872	111.401	1	1	GO:0045210
induction of apoptosis	0.0247441	0.0090059	4.50104	4	99	GO:0006917
positive regulation of apoptosis	0.0416769	0.0118997	5.14157	3	65	GO:0043065
cell adhesion
cell adhesion	9.36279e-06	3.77495e-05	3.92602	16	454	GO:0007155
cell-cell adhesion	0.00326165	0.00268887	7.95719	4	56	GO:0016337
cytokine production
positive regulation of interferon-gamma production	2.5846e-06	1.38944e-05	44.5603	4	10	GO:0032729
negative regulation of interleukin-6 production	0.00095375	0.00110869	55.7004	2	4	GO:0032715
positive regulation of interferon-alpha production	0.0179532	0.00734872	111.401	1	1	GO:0032727
negative regulation of interleukin-12 production	0.0357455	0.0110297	55.7004	1	2	GO:0032695
positive regulation of interleukin-10 biosynthetic process	0.0357455	0.0110297	55.7004	1	2	GO:0045082
positive regulation of interleukin-13 biosynthetic process	0.0357455	0.0110297	55.7004	1	2	GO:0045368
interferon-gamma biosynthetic process	0.0357455	0.0110297	55.7004	1	2	GO:0042095
cell migration
cell migration	0.000823613	0.0010032	11.4257	4	39	GO:0016477
positive regulation of cell migration	0.00253067	0.00226838	13.9251	3	24	GO:0030335
positive regulation of epithelial cell migration	0.0179532	0.00734872	111.401	1	1	GO:0010634
negative regulation of cell migration	0.0301769	0.0100887	10.6096	2	21	GO:0030336
developmental process
aging	2.36895e-09	2.91851e-08	79.5719	5	7	GO:0007568
liver development	7.57029e-07	5.3508e-06	20.8876	6	32	GO:0001889
heart development	0.000352041	0.000567082	6.045	7	129	GO:0007507
exocrine pancreas development	0.000479734	0.000671617	74.2671	2	3	GO:0031017
myoblast proliferation	0.000479734	0.000671617	74.2671	2	3	GO:0051450
erythrocyte differentiation	0.00146388	0.00151921	16.7101	3	20	GO:0030218
limb development	0.00158012	0.00160577	44.5603	2	5	GO:0060173
post-embryonic development	0.00229882	0.00211923	8.73731	4	51	GO:0009791
in utero embryonic development	0.00299455	0.00254328	4.91474	6	136	GO:0001701
decidualization	0.0032789	0.00269797	31.8288	2	7	GO:0046697
positive regulation of embryonic development	0.0179532	0.00734872	111.401	1	1	GO:0040019
retinal cone cell development	0.0179532	0.00734872	111.401	1	1	GO:0046549
eye morphogenesis	0.0179532	0.00734872	111.401	1	1	GO:0048592
epidermal cell differentiation	0.0179532	0.00734872	111.401	1	1	GO:0009913
leading edge cell differentiation	0.0179532	0.00734872	111.401	1	1	GO:0035026
muscle cell fate specification	0.0179532	0.00734872	111.401	1	1	GO:0042694
radial pattern formation	0.0179532	0.00734872	111.401	1	1	GO:0009956
male gonad development	0.022379	0.00847211	12.3779	2	18	GO:0008584
anterior/posterior pattern formation	0.0230939	0.00863792	4.59384	4	97	GO:0009952
angiogenesis	0.0239098	0.00882239	4.54697	4	98	GO:0001525
cell differentiation	0.024671	0.00899003	2.32085	10	480	GO:0030154
negative regulation of angiogenesis	0.0274645	0.0095711	11.1401	2	20	GO:0016525
ectoderm formation	0.0357455	0.0110297	55.7004	1	2	GO:0001705
cardiac muscle cell development	0.0357455	0.0110297	55.7004	1	2	GO:0055013
female genitalia development	0.0357455	0.0110297	55.7004	1	2	GO:0030540
epidermis morphogenesis	0.0357455	0.0110297	55.7004	1	2	GO:0048730
establishment of synaptic specificity at neuromuscular junction	0.0357455	0.0110297	55.7004	1	2	GO:0007529
negative regulation of epithelial cell differentiation	0.0357455	0.0110297	55.7004	1	2	GO:0030857
regulation of melanocyte differentiation	0.0357455	0.0110297	55.7004	1	2	GO:0045634
heart morphogenesis	0.0421063	0.0119577	8.91206	2	25	GO:0003007
ohters
circadian rhythm	6.81027e-05	0.000196915	21.2192	4	21	GO:0007623
cell redox homeostasis	0.00029983	0.000514674	9.94649	5	56	GO:0045454
regulation of locomotion	0.000479734	0.000671617	74.2671	2	3	GO:0040012
regulation of sensory perception of pain	0.00095375	0.00110869	55.7004	2	4	GO:0051930
positive regulation of smooth muscle contraction	0.00158012	0.00160577	44.5603	2	5	GO:0045987
spermatogenesis	0.00383013	0.00303632	4.04044	7	193	GO:0007283
elevation of cytosolic calcium ion concentration	0.0117518	0.00610737	17.1386	2	13	GO:0007204
lactation	0.0177611	0.00731823	13.9251	2	16	GO:0007595
muscle contraction	0.0177611	0.00731823	13.9251	2	16	GO:0006936
cognition	0.0179532	0.00734872	111.401	1	1	GO:0050890
entrainment of circadian clock by photoperiod	0.0179532	0.00734872	111.401	1	1	GO:0043153
regulation of systemic arterial blood pressure by norepinephrine-epinephrine	0.0179532	0.00734872	111.401	1	1	GO:0001993
regulation of vascular smooth muscle contraction	0.0179532	0.00734872	111.401	1	1	GO:0003056
vascular smooth muscle contraction	0.0179532	0.00734872	111.401	1	1	GO:0014829
cytidine to uridine editing	0.0357455	0.0110297	55.7004	1	2	GO:0016554
rhythmic behavior	0.0357455	0.0110297	55.7004	1	2	GO:0007622
negative regulation of smooth muscle contraction	0.0357455	0.0110297	55.7004	1	2	GO:0045986
positive regulation of heart contraction	0.0357455	0.0110297	55.7004	1	2	GO:0045823
positive regulation of vasoconstriction	0.0357455	0.0110297	55.7004	1	2	GO:0045907
