# Supplementary material for: Identification of Hub Genes Related to the Recovery Phase of Irradiation Injury by Microarray and Integrated Gene Network Analysis
Source: PLoS One. 2011 Sep 13;6(9):e24680. doi: 10.1371/journal.pone.0024680 (PMC3172286; doi:10.1371/journal.pone.0024680)
Supplement: Table S7 — The characteristics of GO map and the interaction among these significant GO terms. (XLS) [file pone.0024680.s008.xls]

## Sheet: Sheet1
Table S7 The characteristics of GO map and the interaction among these significant GO terms
GO term	degree	indegree	outdegree
protein amino acid phosphorylation	4	4	0
response to stress	4	4	0
cellular process	3	3	0
cell migration	3	3	0
myeloid cell differentiation	3	1	2
positive regulation of T cell activation	3	2	1
cyclic nucleotide catabolic process	3	2	1
cell adhesion	2	1	1
negative regulation of transcription factor activity	2	2	0
B cell differentiation	2	1	1
defense response to bacterium	2	2	0
positive regulation of protein modification process	2	2	0
response to oxidative stress	2	1	1
T cell activation	2	2	0
protein amino acid autophosphorylation	2	1	1
negative regulation of cell proliferation	2	2	0
cell differentiation	2	2	0
transmembrane transport	2	0	2
cell cycle	2	1	1
epidermal cell differentiation	2	0	2
immune response	2	2	0
positive regulation of protein amino acid phosphorylation	2	0	2
positive regulation of cell migration	2	1	1
instrution:
degree	describes the link numbers one GO term has to the others
indegree	describes the link numbers one GO term has to the low-level ones
ourdegree	describes the link numbers one GO term has to the high-level ones
