# Supplementary material for: Identification of Hub Genes Related to the Recovery Phase of Irradiation Injury by Microarray and Integrated Gene Network Analysis
Source: PLoS One. 2011 Sep 13;6(9):e24680. doi: 10.1371/journal.pone.0024680 (PMC3172286; doi:10.1371/journal.pone.0024680)
Supplement: Table S8 — The genes contained in dynamic co-expression network and the functional categories of its genes with the degree >5. (XLS) [file pone.0024680.s009.xls]

## Sheet: Sheet1
Table S8. The genes contained in dynamic co-expression network and the functional categories of its genes with the degree >5
Gene symbol	response to stimulus	celluar component orgnization	metabolic process	cell death	localization	development process	immune response	gene expression	signaling	cell proliferation	cell cycle process	cytokine prodcution	cell adhesion	description	degree	ClusteringCoefficient	k-core
Trafd1	√													TRAF type zinc finger domain containing 1	18	0.503268	9
H2-T22							√							"histocompatibility 2, T region locus 22"	16	0.608333	9
Serpina3f	√													"serine (or cysteine) peptidase inhibitor, clade A, member 3F"	16	0.466667	9
Hist1h2bm		√												"histone cluster 1, H2bm"	14	0.340659	6
Oas2			√				√							2'-5' oligoadenylate synthetase 2	14	0.659341	9
Tap1					√		√							"transporter 1, ATP-binding cassette, sub-family B (MDR/TAP)"	14	0.659341	9
H2-T10							√							"histocompatibility 2, T region locus 10"	13	0.74359	9
Dnajb9			√											"DnaJ (Hsp40) homolog, subfamily B, member 9"	12	0.454545	6
Dtx3l		√												deltex 3-like (Drosophila)	12	0.712121	9
H2-M3	√		√				√					√		"histocompatibility 2, M region locus 3"	12	0.651515	8
Oasl1							√							2'-5' oligoadenylate synthetase-like 1	12	0.590909	8
AI451557（Nlrc5）	√						√	√						"NLR family, CARD domain containing 5"	11	0.890909	9
Ccnl1								√						cyclin L1	11	0.509091	6
Ifitm3										√				interferon induced transmembrane protein 3	11	0.490909	7
Klf2								√				√		Kruppel-like factor 2 (lung)	11	0.545455	6
LOC56628（H2-K1）	√						√							"histocompatibility 2, K1, K region"	11	0.854545	9
Oasl2							√							2'-5' oligoadenylate synthetase-like 2	11	0.836364	9
Plk2			√						√					polo-like kinase 2 (Drosophila)	11	0.4	6
Cd3d		√					√							"CD3 antigen, delta polypeptide"	10	0.355556	5
Junb	√					√					√			Jun-B oncogene	10	0.577778	6
Csf3r							√							colony stimulating factor 3 receptor (granulocyte)	9	0.416667	5
Hist1h4m（Hist1h4a）		√					√							"histone cluster 1, H4m"	9	0.527778	6
Hist2h2be		√												"histone cluster 2, H2be"	9	0.472222	6
Rhob									√					"ras homolog gene family, member B"	9	0.611111	6
Rnf114						√								ring finger protein 114	9	0.555556	7
0610037M15Rik（H2-Q6）							√							"histocompatibility 2, Q region locus 6"	8	0.785714	7
Hist1h2bb		√												"histone cluster 1, H2bb"	8	0.392857	5
Hist1h4f（Hist1h4a）		√					√							"histone cluster 1, H4f"	8	0.607143	6
Hist1h4i（Hist1h4a）		√					√							"histone cluster 1, H4i"	8	0.571429	5
Hist1h4k		√					√							"histone cluster 1, H4k"	8	0.535714	6
Cd84													√	CD84 antigen	7	0.380952	4
Hist1h1a		√												"histone cluster 1, H1a"	7	0.47619	6
Hist1h2bn		√												"histone cluster 1, H2bn"	7	0.285714	5
Hist4h4（Hist1h4a）		√					√							"histone cluster 4, H4"	7	0.571429	6
Phf11								√						predicted gene 6907	7	0.380952	4
Pml	√	√		√		√	√	√	√	√	√			promyelocytic leukemia	7	0.809524	7
Btg2	√			√			√	√						"B-cell translocation gene 2, anti-proliferative"	6	0.533333	4
D11Lgp2e（Dhx58）							√							DEXH (Asp-Glu-X-His) box polypeptide 58	6	0.533333	4
Egr1	√						√	√	√					early growth response 1	6	0.666667	6
Egr2	√	√				√		√	√					early growth response 2	6	0.8	6
Eif2ak2	√		√			√								eukaryotic translation initiation factor 2-alpha kinase 2	6	0.933333	6
Fcgr3			√				√							"Fc receptor, IgG, low affinity III"	6	0.6	5
G0s2											√			G0/G1 switch gene 2	6	0.466667	4
Hist1h2bk		√												"histone cluster 1, H2bk"	6	0.333333	4
Hist1h4j（Hist1h4a）		√					√							"histone cluster 1, H4j"	6	0.666667	5
Jun	√		√			√	√	√	√	√	√			Jun oncogene	6	0.466667	4
Ccl3	√						√							chemokine (C-C motif) ligand 3	5	0.4	3
Cd33													√	CD33 antigen	5	0.7	4
Hist1h2bf		√												"histone cluster 1, H2bf"	5	0.3	4
Hist1h3a		√												"histone cluster 1, H3a"	5	0.7	5
Hist1h4h（Hist1h4a）		√					√							"histone cluster 1, H4h"	5	0.6	5
Mx2	√						√							myxovirus (influenza virus) resistance 2	5	1	5
Ndrg1							√							N-myc downstream regulated gene 1	5	0.6	4
Ndrl（Ndrg1）							√							N-myc downstream regulated gene 1	5	0.6	4
Nupl2					√									nucleoporin like 2	5	0.2	3
Parp14								√						"poly (ADP-ribose) polymerase family, member 14"	5	0.7	4
Rbm19						√								RNA binding motif protein 19	5	0.5	4
Tinagl1			√				√							tubulointerstitial nephritis antigen-like 1	5	0.7	4
Ybx3（Csda）				√		√		√						cold shock domain protein A	5	0.4	3
Acsl1														acyl-CoA synthetase long-chain family member 1	4	0.166667	2
Acta2														"actin, alpha 2, smooth muscle, aorta"	4	0.833333	4
Adpgk														ADP-dependent glucokinase	4	1	4
Adrb2														"adrenergic receptor, beta 2"	4	0.333333	3
Dhx58														DEXH (Asp-Glu-X-His) box polypeptide 58	4	0.666667	4
E430001K23Rik														"diacylglycerol kinase, gamma"	4	0.166667	2
Hist1h2be														"histone cluster 1, H2be"	4	0.5	3
Hspa1a														heat shock protein 1A	4	1	4
Hspa1b														heat shock protein 1B	4	1	4
Klf4														Kruppel-like factor 4 (gut)	4	0.5	4
Lyz1														lysozyme 1	4	0.833333	4
Mid1														midline 1	4	0.666667	3
Adar														"adenosine deaminase, RNA-specific"	3	1	3
Bmx														BMX non-receptor tyrosine kinase	3	0.333333	2
Ccno														cyclin O	3	1	3
D9Ertd392e														cell cycle progression 1	3	0.333333	2
Ddx58														DEAD (Asp-Glu-Ala-Asp) box polypeptide 58	3	0.666667	3
Ear2														"eosinophil-associated, ribonuclease A family, member 2"	3	0	2
Epor														erythropoietin receptor	3	0	2
Fos														FBJ osteosarcoma oncogene	3	1	3
Hist1h2bj														"histone cluster 1, H2bj"	3	0.666667	3
Hist1h4c														"histone cluster 1, H4c"	3	0.333333	2
Hist1h4d														"histone cluster 1, H4d"	3	0	2
Hspa9														heat shock protein 9	3	0.666667	3
Hyal2														hyaluronoglucosaminidase 2	3	1	3
Klre1														killer cell lectin-like receptor family E member 1	3	0.333333	3
Lgals3bp														"lectin, galactoside-binding, soluble, 3 binding protein"	3	0.333333	3
Lst1														leukocyte specific transcript 1	3	1	3
Ppa1														pyrophosphatase (inorganic) 1	3	0.666667	3
Rap2a														RAS related protein 2a	3	0.333333	2
Serpina3g														"serine (or cysteine) peptidase inhibitor, clade A, member 3G"	3	0.333333	3
Srm														spermidine synthase	3	0.333333	3
Trps1														trichorhinophalangeal syndrome I (human)	3	0.666667	3
Txndc5														thioredoxin domain containing 5	3	0	2
0610010D24Rik														coiled-coil domain containing 88C	2	0	2
Arl5c														ADP-ribosylation factor-like 5C	2	1	2
Atg7														autophagy-related 7 (yeast)	2	1	2
AW212394														major facilitator superfamily domain containing 6	2	1	2
Bzrpl1														translocator protein 2	2	0	2
Cad														"carbamoyl-phosphate synthetase 2, aspartate transcarbamylase, and dihydroorotase"	2	1	2
Ccnd2														cyclin D2	2	1	2
Ccr5														chemokine (C-C motif) receptor 5	2	0	2
Cd59a														CD59a antigen	2	0	2
Ces3														carboxylesterase 3	2	1	2
Cxcl9														chemokine (C-X-C motif) ligand 9	2	1	2
F2r														coagulation factor II (thrombin) receptor	2	1	2
Gadd45a														growth arrest and DNA-damage-inducible 45 alpha	2	1	2
Gypa														glycophorin A	2	0	2
Hdac4														histone deacetylase 4	2	1	2
Hemgn														hemogen	2	0	2
Hipk1														homeodomain interacting protein kinase 1	2	1	2
Hist1h2bh														"histone cluster 1, H2bh"	2	1	2
Hist2h2aa1														"histone cluster 2, H2aa1"	2	0	2
Ifi27														"interferon, alpha-inducible protein 27 like 2A"	2	1	2
Irak3														interleukin-1 receptor-associated kinase 3	2	1	2
Klf6														Kruppel-like factor 6	2	1	2
Lyve1														lymphatic vessel endothelial hyaluronan receptor 1	2	0	2
Lyzs														lysozyme 2	2	1	2
Mapk3														mitogen-activated protein kinase 3	2	1	2
Mpzl3														myelin protein zero-like 3	2	1	2
Mybpc2														"myosin binding protein C, fast-type"	2	1	2
Nrp1														neuropilin 1	2	1	2
Per														perlecan (heparan sulfate proteoglycan 2)	2	1	2
Ralgps2														Ral GEF with PH domain and SH3 binding motif 2	2	1	2
Rgs1														regulator of G-protein signaling 1	2	0	2
S100a13														S100 calcium binding protein A13	2	1	2
Tal1														T-cell acute lymphocytic leukemia 1	2	0	2
Tspan8														tetraspanin 8	2	0	2
Ucp2														"uncoupling protein 2 (mitochondrial, proton carrier)"	2	1	2
Zfp36														ring finger protein 141	2	1	2
1110017D15Rik														RIKEN cDNA 1110017D15 gene	1	0	1
2610016D08Rik														netrin G2	1	0	1
8030404L10Rik														CLIP associating protein 2	1	0	1
Abcg4														"ATP-binding cassette, sub-family G (WHITE), member 4"	1	0	1
Alad														"aminolevulinate, delta-, dehydratase"	1	0	1
Ccl4														chemokine (C-C motif) ligand 4	1	0	1
Col5a1														"collagen, type V, alpha 1"	1	0	1
D830050J10Rik														RIKEN cDNA D830050J10 gene	1	0	1
Dnajb2														"DnaJ (Hsp40) homolog, subfamily B, member 2"	1	0	1
Ear3														"eosinophil-associated, ribonuclease A family, member 3"	1	0	1
Gspt2														G1 to S phase transition 2	1	0	1
Hist2h2aa2														"histone cluster 2, H2aa2"	1	0	1
Hist2h2bb														"histone cluster 2, H2bb"	1	0	1
Hmbs														hydroxymethylbilane synthase	1	0	1
Itgam														integrin alpha M	1	0	1
Kat2a														K(lysine) acetyltransferase 2A	1	0	1
Klf1														Kruppel-like factor 1 (erythroid)	1	0	1
Ly6e														"lymphocyte antigen 6 complex, locus E"	1	0	1
Mmp27														matrix metallopeptidase 27	1	0	1
Myl2														"myosin, light polypeptide 2, regulatory, cardiac, slow"	1	0	1
Nfam1														Nfat activating molecule with ITAM motif 1	1	0	1
Nt5e														"5' nucleotidase, ecto"	1	0	1
Pde1b														"phosphodiesterase 1B, Ca2+-calmodulin dependent"	1	0	1
Sirpa														signal-regulatory protein alpha	1	0	1
Spnb1														spectrin beta 1	1	0	1
Tnfsf13b														"tumor necrosis factor (ligand) superfamily, member 13b"	1	0	1
Instruction:
Clustering Coeffcient	represents the correlation among genes; that is, the greater clustering coeffcient, the more closely co-expression relationship between genes
Degree	is defined as the link numbers one node has to the other; represents the centrality of a gene within a network
K-core	A k-core of a network is a subnetwork in which all nodes are connected to at least k other genes in the subnetwork.
