# Supplementary material for: Identification of Hub Genes Related to the Recovery Phase of Irradiation Injury by Microarray and Integrated Gene Network Analysis
Source: PLoS One. 2011 Sep 13;6(9):e24680. doi: 10.1371/journal.pone.0024680 (PMC3172286; doi:10.1371/journal.pone.0024680)
Supplement: Table S10 — The interaction between irradiation-related genes. (XLS) [file pone.0024680.s011.xls]

## Sheet: Sheet1
Table S10. The interaction between irradiation-related genes
Gene 1	Gene 2
CD4	CD44		Instruction:	the two genes in the same line have protein-protein interaction based on HRPD database
TGFBR1	CD44
LYN	KIT
PIK3R1	KIT
PTPN11	KIT
PTPN6	KIT
SRC	KIT
KIT	STAT1
SOCS1	KIT
PTPN6	LYN
LYN	PRKCD
LYN	BTK
CASP3	LYN
PTK2	LYN
PRKDC	LYN
MAPK3	LYN
PPP1R15A	LYN
RB1	JUN
SP1	JUN
ABL1	JUN
AR	JUN
CREBBP	JUN
STAT1	JUN
PRKDC	JUN
MAPK8	JUN
MAPK3	JUN
SUMO1	JUN
EP300	JUN
MAPK9	JUN
SMAD3	JUN
ATF3	JUN
HIF1A	JUN
NFE2L2	JUND
MAPK8	JUND
MAPK9	JUND
ATF3	JUND
NHEJ1	LIG4
PCNA	CCND1
RB1	CCND1
SP1	CCND1
AR	CCND1
CDKN1B	CCND1
EP300	CCND1
GSK3B	CCND1
RBX1	CCND1
PTPN11	PIK3R1
CDKN2A	NCL
CD4	PIK3R1
SRC	PIK3R1
TGFBR1	PIK3R1
PTK2	PIK3R1
MAPK8	PIK3R1
SOCS1	PIK3R1
PRKCD	PIK3CA
MMP3	SERPINE1
PTPN11	PDGFRA
PCNA	PARP1
XRCC1	PARP1
PRKDC	PARP1
WRN	PARP1
APTX	PARP1
XRCC5	PARP1
PARP2	PARP1
SWAP70	PARP1
RPA1	PCNA
XRCC1	PCNA
FEN1	PCNA
PRKDC	PCNA
ING1	PCNA
CDC6	PCNA
EP300	PCNA
HUS1	PCNA
POLH	PCNA
WRN	PCNA
GADD45B	PCNA
GADD45G	PCNA
MSH6	PCNA
POLB	PCNA
MCL1	PCNA
XRCC5	PCNA
POLM	PCNA
TNFRSF1A	PTPN11
PTPN11	STAT1
PTK2	PTPN11
LEPR	PTPN11
PTPN11	STAT5A
PTPN11	STAT5B
PRKCD	PTPN6
ABL1	PTPN6
PTPN6	SRC
TNFRSF1A	PTPN6
PTPN6	SIRPA
STAT5B	PTPN6
PTPN6	PIK3R1
CSNK2A1	APEX1
XRCC6	APEX1
PCNA	APEX1
XRCC1	APEX1
FEN1	APEX1
EP300	APEX1
HIF1A	APEX1
MAPK1	RB1
MAPK1	SP1
MAPK1	MYB
RPS6KA3	MAPK1
MAPK14	MAPK1
MAP2K2	MAPK1
MAPK1	PPARG
STAT5A	MAPK1
MAPK1	CASP9
POLB	APEX1
MAPK1	IER3
NEK2	MAPK1
STAT5B	MAPK1
HDAC4	MAPK1
PRKCD	CREBBP
PRKCD	NFE2L2
PRKCD	STAT1
PRKDC	PRKCD
PRKCD	EP300
PPP1CA	PRKCD
RAD18	UBE2B
RAG2	RAG1
RPA1	RAD51
ABL1	RAD51
FANCD2	RAD51
BRCA2	RAD51
CASP3	RAD51
SUMO1	RAD51
RAD54L	RAD51
RAD54B	RAD51
BLM	RAD51
ATM	RAD51
RPA2	RPA1
RPA3	RPA1
XPA	RPA1
PRKDC	RPA1
BLM	RPA1
WRN	RPA1
RAD52	RPA1
RPA3	RPA2
XPA	RPA2
PRKDC	RPA2
RAD52	RPA2
SP1	RB1
ABL1	RB1
MYC	RB1
AR	RB1
CASP3	RB1
E2F4	RB1
BAG1	RB1
SMARCB1	RB1
CTBP1	RB1
MDM4	RB1
CCNA1	RB1
RBBP8	RB1
E2F4	RBL2
RBBP8	RBL2
RRM1	RRM2
CDH1	RRM2
RRM2B	RRM1
MET	SMC1A
RET	PTK2
RET	MAPK1
RET	MAPK8
RET	MAPK14
RET	MAPK3
CHEK1	UBB
CHEK1	CUL4A
TGFBR1	CLU
SUMO1	FOS
UBB	IKBKB
CXCL12	CD4
NR4A1	RPS6KA3
SRC	TERT
XRCC5	TERT
WEE1	CSNK2A1
E2F1	SP1
MYC	SP1
CASP3	SP1
MAPK3	SP1
KLF4	SP1
MDM4	E2F1
CHEK2	E2F1
ATM	E2F1
ATR	E2F1
TOPBP1	E2F1
SRC	ABL1
ABL1	BTK
PRKDC	ABL1
ABL1	CASP9
ATM	ABL1
POLR2A	ABL1
ABL1	GPX1
ABL1	RAD52
CREBBP	MYB
EP300	MYB
HIPK2	MYB
MAPK8	MYC
SMARCB1	MYC
CCNT1	MYC
CDC6	MYC
SMAD3	MYC
MYC	CDK1
STAT1	SRC
SRC	PTK2
STAT5A	SRC
SMARCB1	SRC
SRC	STAT5B
YWHAE	SRC
TGFBR1	TGFB1
DAXX	TGFB1
YWHAE	TGFB1
SMAD7	TGFBR1
SMAD3	TGFBR1
DTX1	NOTCH1
SMAD3	NOTCH1
GSK3B	NOTCH1
UBB	MYC
SRC	NOS2
FANCC	HSP90B1
TLR4	HSP90B1
STAT1	TNFRSF1A
CHUK	TNFRSF1A
DAPK1	TNFRSF1A
RIPK1	TNFRSF1A
MADD	TNFRSF1A
CSNK1A1	TNFRSF1B
STAT1	TNFRSF1B
VEGFA	KDR
ATR	KDR
CASP3	CDH1
CASP8	CDH1
GSK3B	CDH1
LIG3	XRCC1
OGG1	XRCC1
XRCC1	APTX
POLB	XRCC1
PNKP	XRCC1
PARP2	XRCC1
NEIL1	XRCC1
FANCD2	FANCC
STAT1	FANCC
FANCG	FANCC
FANCA	FANCC
BRCA2	FANCD2
ATM	FANCD2
RASSF1	XPA
AR	FLNA
BRCA2	FLNA
MAPK14	FLNA
MAP2K4	FLNA
BLM	SMC1A
SMC3	SMC1A
RAD21	SMC1A
ATM	SMC1A
MDC1	SMC1A
CREBBP	RPS6KA3
MAPK3	RPS6KA3
CASP3	XIAP
CASP9	XIAP
DIABLO	XIAP
HTRA2	XIAP
B2M	CALR
SLC2A1	CALR
PRF1	CALR
VWF	CALR
AR	CALR
BTK	STAT5A
IL15	IL2RG
STAT1	IL2RG
STAT5A	IL2RG
CREBBP	AR
BAG1	AR
SUMO1	AR
SMAD3	AR
CDK9	AR
XRCC6	CD40
CD40LG	CD40
XRCC5	CD40
BAK1	BCL2L1
BAG1	BCL2L1
CASP8	BCL2L1
APAF1	BCL2L1
CASP9	BCL2L1
BCL2L11	BCL2L1
PMAIP1	BCL2L1
PPP1CA	BCL2L1
BAK1	BAX
SFN	BAX
MCL1	BAX
PMAIP1	BAX
NFE2L2	CREBBP
STAT1	CREBBP
KLF4	CREBBP
EP300	CREBBP
HIF1A	CREBBP
HIPK2	CREBBP
POLR2A	CREBBP
CCNG1	CDKN2A
CDC6	CDKN2A
STAT5A	BRCA2
PLK1	BRCA2
SMAD3	BRCA2
MAP2K6	MAPK14
MAP2K4	MAPK14
MAPK3	MAPK14
SMAD7	MAPK14
MAPK14	SMAD3
HTRA2	MAPK14
EP300	FEN1
WRN	FEN1
CASP3	NFE2L2
PPARG	NFE2L2
CSNK1A1	BID
BID	BAK1
MCL1	BAK1
PTK2	STAT1
CASP3	PRKDC
CASP3	IL18
BIRC2	CASP3
BIRC3	CASP3
CASP8	CASP3
CASP3	MDM4
BIRC5	CASP3
CASP3	BLM
BIRC7	CASP3
CASP2	BID
SMAD3	E2F4
PRKDC	CHUK
CASP8	CHUK
CD86	CD80
GSK3B	PTK2
PPP1CB	PTK2
CCNA1	CDKN1B
YWHAE	CDKN1B
DDB1	DDB2
H2AFX	MRE11A
NBN	MRE11A
RAD50	MRE11A
ATM	MRE11A
MAPK3	DAPK1
FADD	DAPK1
MAPK8	PRKDC
WRN	PRKDC
ATM	PRKDC
XRCC5	PRKDC
XRCC4	PRKDC
NBN	TERF1
SOCS3	LEPR
MAP2K4	MAPK8
MAPK8	PPARG
MAP2K7	MAPK8
SMAD3	MAPK8
MAPK8	BCL2L11
SMAD7	MAP2K6
MAP2K2	MAPK3
MAP2K2	CASP9
HIPK2	PTCH1
MAP2K4	MAPK9
CSNK2A1	BRCA1
ATM	BRCA1
CDK1	BRCA1
CDK2	BRCA1
MLH1	BRCA1
CDK4	BRCA1
CCNA2	BRCA1
CCNB1	BRCA1
ESR1	BRCA1
NFKB1	BRCA1
RELA	BRCA1
AKT1	BRCA1
JUN	BRCA1
JUND	BRCA1
CCND1	BRCA1
RAD51	BRCA1
RB1	BRCA1
SP1	BRCA1
E2F1	BRCA1
GADD45B	PPARG
GADD45G	PPARG
MYC	BRCA1
PPP1R15A	BAG1
XRCC1	BRCA1
STAT5B	STAT5A
FANCD2	BRCA1
SMC1A	BRCA1
AR	BRCA1
CREBBP	BRCA1
BRCA2	BRCA1
STAT1	BRCA1
EP300	ING1
CASP3	BRCA1
E2F4	BRCA1
RBBP8	BARD1
POLR2A	BARD1
STAT5A	BRCA1
BARD1	BRCA1
H2AFX	BRCA1
CTBP1	BRCA1
NBN	BRCA1
EP300	BRCA1
PPP1R15A	SMARCB1
UBE2D3	BRCA1
RBBP8	BRCA1
CHEK2	BRCA1
STAT3	PML
FANCA	BRCA1
POLR2A	BRCA1
DIABLO	BIRC2
HTRA2	BIRC2
CASP9	BIRC3
DIABLO	BIRC3
HTRA2	BIRC3
MDC1	BRCA1
EIF4E	PML
CASP8	BID
APAF1	CASP8
FADD	CASP8
IKBKB	CASP8
CASP8	RIPK1
TNFRSF10B	CASP8
MAP3K14	CASP8
CASP8	CDKN1B
CASP8	PARP2
NBN	H2AFX
ATM	H2AFX
PPP1CA	H2AFX
MAPK3	CASP9
IER3	MAPK3
HIF1A	MAPK3
HDAC4	MAPK3
XRCC4	LIG4
NR4A1	PML
CTNNB1	CDH2
PIK3R1	CDH2
RELA	PML
DNMT3B	SUMO1
SUMO1	DAXX
SUMO1	HIPK2
RAD52	SUMO1
SUMO1	PARK7
SUMO1	NFKBIA
MDM2	PML
BLM	TERF2
WRN	TERF2
RB1	PML
PLK1	CHEK2
SP1	PML
FADD	MYD88
TLR4	MYD88
MYB	PML
CASP9	APAF1
BIRC5	CASP9
BIRC7	CASP9
TGFBR1	PML
GSK3B	ILK
RIPK1	FADD
TNFRSF10B	FADD
CREBBP	PML
CDK9	CCNT1
MAPK14	PML
EP300	DTX1
RBBP8	CTBP1
CDT1	CDC6
RAD50	NBN
CHEK2	NBN
ATM	NBN
CDK9	NBN
PPP1CC	AURKA
PPP1CA	AURKA
MDM4	EP300
SMAD7	EP300
HIF1A	EP300
EPAS1	EP300
SIRT1	EP300
SMAD3	MDM4
SUMO1	PML
RAD51L1	RAD51C
XRCC3	RAD51C
CCNT1	PML
MAP2K7	MAPK9
MAPK9	BCL2L11
PML	AURKA
PLK3	CHEK2
FANCA	FANCG
DAXX	PML
ATM	CHEK1
ATR	CHEK1
CHEK1	TLK1
ATF3	SMAD3
HUS1	RAD1
RAD17	RAD1
HIPK2	DAXX
HSPB1	DAXX
FANCA	IKBKB
DIABLO	BIRC5
TNFRSF10B	RIPK1
MAP3K14	RIPK1
TNFRSF10B	TNFSF10
TOPBP1	PML
RAD17	HUS1
MCL1	BCL2L11
MCM4	CCNA1
CCNA1	E2F1
CCNA1	RBL2
NEK2	PPP1CA
ATM	RBBP8
ATM	CHEK2
ATR	CHEK2
MUS81	CHEK2
CHEK2	MDC1
WRN	BLM
ATM	WRN
XRCC5	WRN
CSNK2A1	CTNNB1
CDKN1A	CSNK2A1
CDK1	CSNK2A1
CSNK2A1	CDC25B
ATF2	CSNK2A1
CSNK2A1	LIG1
TOP1	CSNK2A1
CSNK2A1	EGR1
GADD45G	GADD45B
FGF2	CSNK2A1
CSNK2A1	PTPRC
MGMT	CSNK2A1
HDAC4	YWHAE
CSNK2A1	NFKBIA
CSNK2A1	RELA
NCL	CSNK2A1
FOS	CSNK2A1
CSNK2A1	JUN
CSNK2A1	SPP1
CSNK2A1	SP1
CSNK2A1	MYB
CSNK2A1	MYC
HSP90B1	CSNK2A1
BIRC7	DIABLO
HTRA2	DIABLO
CSNK2A1	CDH1
CREBBP	CSNK2A1
HTRA2	BIRC7
HMGA2	CSNK2A1
CSNK2A1	PTEN
CSNK2A1	BID
ATM	RAD17
ATM	TOPBP1
MDC1	ATM
HSPB1	EIF4G1
ATR	RAD17
PMAIP1	MCL1
XRCC5	POLD1
XRCC5	POLR2A
ABL2	CAT
PTPN11	CAT
CEBPA	CTNNB1
EGFR	CTNNB1
ERBB2	CTNNB1
BRCA1	STAT3
CCND1	CTNNB1
PIK3R1	CTNNB1
APC	CTNNB1
PTPN6	CTNNB1
CDKN1A	STAT3
SRC	CTNNB1
TGFBR1	CTNNB1
CDH1	CTNNB1
AR	CTNNB1
CREBBP	CTNNB1
CSNK1A1	CTNNB1
CASP3	CTNNB1
CHUK	CTNNB1
CASP8	CTNNB1
SMAD3	CTNNB1
IKBKB	CTNNB1
BTRC	CTNNB1
GSK3B	CTNNB1
CTSG	PARP1
CTSG	CXCL12
SERPINB13	CTSG
LCK	STAT3
CDK9	RB1
CDK9	POLR2A
NFKB1	STAT3
RELA	STAT3
MAPK1	SMAD3
PTPN11	SIRPA
RET	STAT3
MAPK1	TNFRSF1A
CDKN1A	CEBPA
CDK2	CEBPA
ATF2	CEBPA
CDK4	CEBPA
MET	STAT3
RB1	CEBPA
MYC	CEBPA
JUN	STAT3
CDK2	CDKN1A
CDK4	CDKN1A
CCND1	STAT3
CCNE1	CDKN1A
XRCC6	CDKN1A
AKT1	CDKN1A
CCND1	CDKN1A
PARP1	CDKN1A
PCNA	CDKN1A
RB1	CDKN1A
TK1	CDKN1A
CASP3	CDKN1A
MAPK8	CDKN1A
CDC6	CDKN1A
CCNA1	CDKN1A
PTPN11	STAT3
GADD45B	CDKN1A
GADD45G	CDKN1A
MAPK1	STAT3
CDK1	CDC25A
CDC25B	CDK1
PRKCD	STAT3
CCNA2	CDK1
CCNB1	CDK1
CCNE1	CDK1
GADD45A	CDK1
ERCC2	CDK1
RPA2	STAT3
CDC25C	CDK1
CDK1	NPM1
LYN	CDK1
PCNA	CDK1
CDK1	RPA2
CDK1	RB1
CDK1	RRM2
CDK1	E2F1
CDK1	ABL1
SRC	STAT3
WEE1	CDK1
FANCC	CDK1
CDK1	FEN1
CDK1	HMGA2
CHAF1B	CDK1
SFN	CDK1
AR	STAT3
CDK1	BIRC5
CCNA1	CDK1
CDK1	PTTG1
GADD45B	CDK1
GADD45G	CDK1
CREBBP	STAT3
CDT1	CDK1
STAT1	STAT3
PTPN11	SOCS3
PTPN11	RET
BRCA1	ABL1
PTPN6	FLT3
LEPR	STAT3
BRCA1	POU2F1
BRCA1	PPP1CA
AURKA	BRCA1
ATR	BRCA1
CDC25A	CDK2
MAPK8	STAT3
AKT1	GSK3B
CCNB1	CDC25A
CCNE1	CDC25A
EGFR	CDC25A
CSNK2A1	XRCC1
CDC25A	RAF1
TNFRSF1A	IKBKB
SP1	PRKDC
RRM2B	RRM2
WEE1	CDK2
CHEK1	CDC25A
PML	SMAD3
BTRC	CDC25A
CCNA1	CDC25A
CHEK2	CDC25A
B2M	CD8A
CLU	LEPR
MDC1	H2AFX
ESR1	CDC25B
AR	CDC25B
CREBBP	CDC25B
PLK1	WEE1
WEE1	BTRC
MAPK3	STAT3
AURKA	CDC25B
CHEK1	CDC25B
YWHAE	CDC25B
RAD1	POLB
RAD1	FEN1
PRKDC	LIG4
JUN	TOP1
RAD52	WRN
RAD52	RAD51
RAD52	ERCC2
RAD52	ERCC4
MAPK3	STAT5A
ABL1	PIK3R1
APC	CTBP1
ATF2	NBN
BARD1	XRCC6
BCL2L1	CRYAA
BCL2L1	CRYAB
BRCA1	SMAD3
CDK1	CDKN1A
CDK4	TGFBR1
CDKN2A	HIF1A
CDKN2A	MYC
CDKN2A	WRN
CHUK	ESR1
CHUK	TGFBR1
CREBBP	CTBP1
CSNK1A1	TGFBR1
CTBP1	EP300
CTNNB1	NFKB1
CUL4A	DDB1
EP300	STAT3
DDB2	XPC
EGFR	STAT3
EGR1	SP1
EIF2AK4	TGFBR1
EP300	PML
EP300	SMAD3
IGF1R	PRKCD
IKBKB	TGFBR1
PML	PAXIP1
CCNA2	CDK2
CDK2	CCNE1
BCL2	CDK2
LYN	CDK2
CDK2	PTHLH
PCNA	CDK2
RASSF1	TNFRSF1A
CDK2	RB1
RBL2	CDK2
SMAD3	WEE1
TGFBR1	UBB
FEN1	CDK2
CDK2	CDKN1B
BAX	BID
BCL2L1	BID
CHAF1B	CDK2
CDC25B	MAPK14
MYC	PML
CREBBP	SMAD3
NBN	XRCC5
NBN	PRKDC
ATM	XRCC5
ATR	NBN
ATR	XRCC5
CDK2	CDC6
CCNA1	CDK2
HTT	SUMO1
PTK2	RIPK1
CDT1	CDK2
PIK3R1	RB1
CD8A	LCK
CCNB1	CDKN1A
CCNA2	CDKN1A
SUMO1	TNFRSF1A
MAPK3	MYC
DDB2	E2F1
CDK2	POLD1
BRCA1	CCNA1
BAX	BCL2L1
XIAP	TGFBR1
MAP3K14	MAPK3
KAT5	E2F1
KAT5	ATM
KAT5	CREB1
DCLRE1C	PRKDC
KAT5	MYC
MAPK1	MCL1
DCLRE1C	ATM
DCLRE1C	BRCA1
DCLRE1C	NBN
DCLRE1C	RAD50
DCLRE1C	MRE11A
KAT5	STAT3
KAT5	GADD45G
KAT5	BARD1
KAT5	GAPDH
KAT5	MDM2
KAT5	AR
KAT5	CDK1
KAT5	CCNB1
KAT5	CREBBP
KAT5	EP300
KAT5	NFKB1
ERCC2	RAD51
CASP3	MLH1
RUNX1	EP300
AKT1	HMOX1
ERCC5	POLR2A
ERCC6	PARP1
CDC25A	SMAD3
CHEK1	MDM4
CHEK2	MDM4
AKT1	MDM4
ATM	MDM4
CASP1	AR
CDK2	SMAD3
CDK4	SMAD3
SMARCB1	PPP1CC
CDK1	TK1
PLK3	MAPK1
NFKB1	NFKBIA
RELA	NFKBIA
IKBKB	NFKBIA
BTRC	NFKBIA
NFKB1	RELA
RELA	NFKB2
BTRC	NFKB2
RELB	NFKB2
PARP1	RELA
CREBBP	RELA
CHUK	RELA
MAP3K14	CHUK
MAP3K14	IKBKB
MLH1	TRIM29
GAPDH	RPA2
GAPDH	TK1
KRT19	FANCG
MMP9	COL4A1
FN1	COL4A1
MMP2	IL1B
TIMP2	MMP2
TGFB1	MMP2
CXCL12	MMP2
FN1	MMP9
TNF	CSF1
SOCS1	CSF1
PCNA	MSH2
SMC1A	MSH2
BARD1	MSH2
CHEK2	MSH2
MSH6	MSH2
ATR	MSH2
MYC	MLH1
PMS2	MLH1
BLM	MLH1
TRIM29	HINT1
CDK2	CCNH
STAT1	MAPK14
MAPK3	RAF1
MAPK3	PRKCD
MAPK1	PRKCD
MAPK8	MAPK14
MAPK8	MAPK3
MAPK8	MAPK1
IFNG	TNF
STAT1	EP300
YBX1	SMAD3
FOS	STAT1
EP300	STAT5B
EP300	STAT5A
RAF1	KRAS
IL7R	PIK3R1
CXCR4	PTPN11
STAT1	CXCR4
STAT3	CXCR4
STAT5B	CXCR4
SOCS1	CXCR4
CXCR4	PTPRC
SRC	KDR
KDR	PTPN6
KDR	PTPN11
STAT1	KDR
EGFR	MET
IL7R	STAT5A
IL7R	STAT5B
IL7R	STAT3
KDR	CTNNB1
STAT3	STAT5A
STAT3	STAT5B
SRC	PTPN11
STAT3	IGF1R
STAT3	PDGFRA
CD40	PIK3R1
CD40	BIRC2
CD40	BIRC3
CSNK2A1	CASP2
CTNNB1	MET
CTNNB1	EP300
CTSG	CXCR4
CTSG	VCAM1
CDK1	AR
CDK1	PTCH1
ATF2	AR
ELANE	CXCR4
ELANE	VCAM1
ELANE	CXCL12
EGFR	FAS
EGFR	MAPK1
EGFR	AR
EPOR	STAT5B
ESR1	IGF1R
ESR1	NFKB1
ESR1	RELA
ESR1	ERBB2
ESR1	JUND
ESR1	SP1
ESR1	USF1
ESR1	MAPK3
ESR1	SMAD3
ESR1	CCNH
FAS	MET
FAS	PTPN6
FAS	APAF1
FGF2	RPS6KA3
FN1	HGF
IGF1R	MDM2
RUNX1	AR
BCL2	MAPK3
LCK	PTK2
LCK	STAT5A
MITF	MAPK1
MITF	MAPK14
MITF	EP300
CXCR4	PTK2
HMGB1	TLR4
NFKBIA	NFKB2
NFKBIA	CHUK
NFKBIA	UBE2D3
NFKBIA	HSPB1
NFKB1	NFKB2
NFKB1	UBE2D3
NFKB1	BTRC
NFKB1	RELB
NFKB2	CHUK
NFKB2	IKBKB
RELA	BTK
RELA	STAT1
RELA	MAP2K6
RELA	RELB
POU2F1	STAT5A
POU2F1	STAT5B
AKT1	PIK3R1
AKT1	STAT1
AKT1	PRKDC
AKT1	IKBKB
BRAF	MAPK1
RAF1	PRKCD
RAF1	MAP2K2
FOS	SMAD3
MET	PIK3R1
MET	CASP3
KIT	ABL1
KIT	BTK
KIT	STAT5A
KIT	STAT5B
LYN	CASP9
JUND	MAPK1
JUND	MAPK3
JUND	SMAD3
PIK3R1	PDGFRA
PDGFRA	STAT1
PDGFRA	STAT5A
PDGFRA	STAT5B
APC	GSK3B
PTPN11	PTPN6
PTPN11	CHUK
PTPN11	MAPK3
MAPK1	AR
MAPK1	PPP1CA
PRKCD	SRC
TERT	MTOR
SP1	AR
SP1	SMAD3
SRC	CHUK
SRC	IKBKB
NOTCH1	EP300
TNF	TNFRSF1A
TNF	TNFRSF1B
TNFRSF1A	FANCD2
TNFRSF1A	PTK2
TNFRSF1B	FANCD2
WEE1	CASP3
AIFM1	CASP3
CRYAB	CRYAA
BTK	MYD88
BTK	TLR4
BTK	TLR9
AR	CASP3
AR	PTEN
AR	CCNH
HSPB1	CRYAA
CREBBP	CHUK
STAT1	STAT5A
STAT1	FADD
STAT1	STAT5B
CASP3	BID
HSPB1	CRYAB
CASP3	MCL1
MAP2K4	MAP3K14
SMARCB1	RELB
MAPK3	PPP1CA
BID	MCL1
MAPK9	SMAD3
SMAD3	BTRC
SMAD3	RBX1
AKT1	CREB1
MADD	TNFRSF10B
RPS6KA3	CREB1
CREBBP	CREB1
MAPK14	CREB1
GSK3B	CREB1
PNKP	XRCC4
CSNK2A1	XRCC4
FOS	ATF2
JUN	ATF2
ERCC6	ERCC8
RB1	ATF2
BCL2L1	MAPK8
CASP8	RB1
CASP2	RB1
MAPK14	ATF2
CASP9	RB1
CDK1	MDM4
APAF1	CASP3
BCL2	MAPK14
AR	DAXX
MAPK8	ATF2
DAPK1	MAPK1
PCNA	POLD1
MDC1	NBN
MAPK9	ATF2
CASP3	YWHAE
SMAD3	ATF2
CHEK1	RELA
CASP8	SUMO1
APTX	XRCC4
CDC25B	SFN
MDM2	NPM1
CREBBP	DAXX
MAPK9	RB1
LYN	UBB
CDKN2A	E2F1
BRCA1	UBB
AKT1	BCL2L11
FANCG	BRCA2
XRCC3	FANCG
ING1	SFN
ING1	YWHAE
CUL4A	CDKN1B
CCND1	CDK4
CDK4	RB1
CDKN2A	CDK4
CDKN2B	CDK4
CDKN1B	CDK4
ERCC8	DDB1
EGFR	UBB
BIRC5	CDK4
BARD1	MDC1
EP300	MDC1
EP300	MSH6
EP300	RAD50
NBN	EP300
MRE11A	EP300
CEBPA	EP300
EP300	PAX6
MYC	EP300
EP300	ING2
IRF1	EP300
RB1	EP300
SP1	EP300
CREBBP	MSH6
MSH2	CREBBP
CEBPA	CREBBP
MYC	CREBBP
E2F1	CREBBP
CREBBP	MDC1
MDM2	CREBBP
CDH2	CREBBP
UBB	CDKN1B
CDC25C	CCNA2
RBL2	CCNA2
E2F1	CCNA2
CDKN1B	CCNA2
CDC6	CCNA2
CDT1	CCNA2
CDC25C	CCNB1
PCNA	CCNB1
CDKN1B	CCNB1
PTCH1	CCNB1
PLK1	CCNB1
GADD45B	CCNB1
GADD45G	CCNB1
RBL2	CCNE1
AR	CCNE1
MRE11A	CCNE1
NBN	CCNE1
GSK3B	CCNE1
UBB	PCNA
UBB	FANCD2
UBB	BIRC2
UBB	ERBB2
AR	XRCC6
AR	XRCC5
CCNA1	XRCC6
XIAP	BIRC5
XIAP	UBB
ATR	XPA
PRKDC	XPA
ATM	XPA
GSK3B	MCL1
SRC	FHIT
CDK2	MCM4
CDK1	MCM4
CDT1	UBB
CDT1	PCNA
HIPK2	PAX6
NPM1	CDK2
RB1	E2F1
PARP1	NPM1
PARP1	NCL
CCND1	ESR1
AKT1	YBX1
CDC25A	YWHAE
GADD45A	CDKN1A
BIRC2	CASP9
CSNK1A1	FADD
TERF1	ATM
RBL2	CCND1
RUNX1	CCND1
PRF1	GZMB
GZMB	PARP1
ESR1	CCNT1
GZMB	CASP3
GZMB	PTK2
GZMB	PRKDC
MMP3	SPP1
GZMB	BID
CASP9	CASP3
AR	EP300
MYC	GSK3B
GZMB	XRCC4
BCL2	CYCS
BCL2L1	CYCS
APAF1	CYCS
CASP9	CYCS
GZMB	CASP9
HSPB1	CYCS
XRCC6	NOTCH1
GAPDH	ACTB
NPM1	GADD45A
PCNA	GADD45A
SIRT1	RELA
GSK3B	CEBPA
ERCC5	ERCC2
HMGB1	DNMT1
PCNA	DNMT1
RB1	DNMT1
DNMT3B	DNMT1
DAXX	DNMT1
ERCC4	ERCC1
XPA	ERCC1
PCNA	LIG1
MRE11A	LIG1
NCL	TOP1
CASP3	TOP1
SUMO1	TOP1
PARP1	LIG3
NOS2	ACTB
ABL1	DDB1
ABL1	DDB2
LYN	ACTB
NFKB1	CHUK
CASP3	MDM2
CSNK2A1	HIF1A
EGFR	LYN
EGFR	GAPDH
EGFR	SFN
EGFR	ICAM1
DMD	KRT19
ESR1	KAT5
LYN	CDKN1B
ABL1	CDKN1B
PRKCD	ACTB
NOTCH1	XIAP
PARK7	DAXX
NFKB2	HDAC4
MDM2	UBB
ABL1	TERT
RUNX1	CEBPA
RAD51	RAD51C
ABL1	YWHAE
ABL1	SFN
MDM4	CSNK1A1
MDM4	YWHAE
HIPK2	MDM2
CASP8	MAPK3
CASP8	MAPK1
CASP8	AR
HIF1A	SP1
BLM	FEN1
HIF1A	AR
ILK	CASP9
ILK	CASP8
ERBB2	PTPN11
AR	SRC
SRC	CDKN1B
PARP1	XRCC6
RASSF1	DAXX
MAPK8	RASSF1
PARP1	E2F1
CHEK2	MDM2
CDK2	EP300
MDM4	SFN
RELA	EGR1
AKT1	SMAD3
AKT1	SMAD7
DAXX	MDM2
JUN	EGR1
RB1	PPP1CA
CREBBP	EGR1
VEGFA	AKT1
CASP9	DIABLO
EP300	EGR1
VEGFA	YBX1
YBX1	MAPK1
YBX1	GSK3B
RIPK1	NFKB1
SERPINE1	ELANE
SERPINB13	ELANE
TOPBP1	AKT1
BRCA2	CCNA2
BRCA2	CCNE1
BRCA2	CDK1
BRCA2	CDK2
EP300	ABL1
HIPK2	RUNX1
MITF	CTNNB1
PPP1CA	BAX
PPP1CA	APAF1
PPP1CA	CDH1
PPP1CA	PCNA
PPP1CA	PTEN
PPP1CB	RB1
PPP1CC	RB1
CSNK1A1	ACTB
CTNNB1	HIF1A
CHEK1	RAD51
RELA	SOCS1
FLNA	CCNB1
WRN	H2AFX
APLF	XRCC4
APLF	LIG4
CHUK	IKBKB
ATM	CREB1
APLF	XRCC1
BLM	TERF1
STAT3	DAXX
PML	CSNK2A1
ABL1	CREB1
GADD45A	MAPK14
MEN1	FANCD2
AR	GSK3B
MCL1	BCL2L1
CHEK1	XIAP
MAP2K7	GADD45B
GSTP1	FANCC
BRCA2	RPA1
BCL2	PML
FANCD2	NBN
MRE11A	FANCD2
BCL2	MYC
CDK1	FANCG
FANCA	CDK1
BLM	CHEK1
SUMO1	HDAC4
ESR1	CTNNB1
BLM	FANCD2
XRCC4	NHEJ1
CTNNB1	SMAD7
MTOR	STAT3
STAT3	HIF1A
CTNNB1	PLK1
CDC25A	AR
EGR1	CDKN2A
NFKB1	MEN1
HMGA2	SMAD3
DDB2	XPA
NFKB2	MEN1
RELA	MEN1
JUND	MEN1
AURKA	GSK3B
RBBP8	PCNA
RPA2	MEN1
SMAD3	MEN1
PTPN11	SELE
FLNA	SELE
ESR1	CDKN1A
PTK2	SELE
MAP3K1	RAF1
MAP3K1	MAPK1
HUS1	RPA1
HUS1	RPA2
MYB	BTRC
HIPK2	BTRC
RAD1	RPA2
RAD1	RPA1
DDB2	CUL4A
CUL4A	RBX1
IGF1R	UBC
HIF1A	NR4A1
SNAI1	GSK3B
MDC1	RNF8
USF1	PRKDC
CHUK	CHEK1
RASSF1	MDM2
PPM1D	MDM2
CASP1	IL1A
CASP1	FGF2
MAP3K14	BIRC3
ING1	NQO1
E2F1	GSK3B
EGFR	EGF
NRG1	EGF
ERBB2	EGF
ESR1	EGFR
HTT	EGFR
CASP1	EGFR
SMAD3	ACTB
XRCC6	EGFR
EGFR	ERBB2
PIK3R1	EGFR
PTPN11	EGFR
PTPN6	EGFR
PRKCD	EGFR
SRC	EGFR
CDH1	EGFR
EGFR	STAT1
PTK2	EGFR
STAT5A	EGFR
RIPK1	EGFR
SOCS1	EGFR
SOCS3	EGFR
EGFR	STAT5B
MAP3K14	EGFR
EPOR	EPO
KIT	EPOR
LYN	EPOR
PIK3R1	EPOR
PTPN11	EPOR
PTPN6	EPOR
MAPK1	EPOR
STAT5A	EPOR
MAPK3	EPOR
SOCS3	EPOR
LCK	ESR1
POU2F1	ESR1
AKT1	ESR1
MDM2	ESR1
JUN	ESR1
PIK3R1	ESR1
PTPN6	ESR1
MAPK1	ESR1
SRC	ESR1
RPS6KA3	ESR1
AR	ESR1
CREBBP	ESR1
MAPK14	ESR1
BAG1	ESR1
STAT5A	ESR1
EP300	ESR1
POLR2A	ACTB
GADD45B	ESR1
GADD45G	ESR1
EIF4G1	EIF4E
ERCC6	ERCC5
PCNA	ERCC5
NTHL1	ERCC5
XPA	ERCC6
CHEK2	ERCC6
POLR2A	ERCC6
LCK	FAS
BTK	FAS
CASP8	FAS
SUMO1	FAS
FADD	FAS
DAXX	FAS
RIPK1	FAS
MAPK8	GSTP1
CXCL12	FN1
SOCS1	FLT3
VWF	HSPA5
GAPDH	SLC2A1
SUMO1	SLC2A1
HTT	GAPDH
AR	GAPDH
BCL2	NR4A1
AKT1	NR4A1
MAPK1	NR4A1
EP300	NR4A1
JUN	NFE2L2
NOS1	HMOX1
PRKCD	CD34
MET	HGF
CASP1	HTT
XRCC6	HTT
AKT1	HTT
SP1	HTT
CREBBP	HTT
CASP3	HTT
CTBP1	HTT
IL7R	IL7
IL2RG	IL7
LYN	IL7R
IL2RG	IL7R
LYN	FCER1G
IGF1	IGF1R
PIK3R1	IGF1R
PTPN11	IGF1R
SRC	IGF1R
SOCS1	IGF1R
SOCS3	IGF1R
YWHAE	IGF1R
BCL2	SOD1
UBB	CDC25A
NFKB1	IRF1
RELA	IRF1
STAT1	IRF1
UBB	JUN
PTHLH	IL6
CASP1	IL1B
CASP1	PARP1
CASP1	BCL2L1
NFE2L2	CASP1
CASP1	IL18
CASP1	BID
IL2RG	IL2
IL2RG	ICAM1
FOS	RUNX1
JUN	RUNX1
RAF1	BCL2
PARP1	BCL2
MAPK1	BCL2
KRAS	BCL2
BCL2L1	BCL2
BAX	BCL2
BAK1	BCL2
CASP3	BCL2
MAPK8	BCL2
BAG1	BCL2
CASP8	BCL2
BID	BCL2
BCL2L11	BCL2
PMAIP1	BCL2
PPP1CA	BCL2
PTPRC	LCK
PTPRC	LYN
PTPN6	PTPRC
CD8A	PTPRC
CD4	PTPRC
POU2F1	XRCC6
PCNA	XRCC6
CLU	XRCC6
TERT	XRCC6
ABL1	XRCC6
MRE11A	XRCC6
PRKDC	XRCC6
MAPK8	XRCC6
TERF2	XRCC6
CHEK1	XRCC6
PTTG1	XRCC6
WRN	XRCC6
XRCC5	XRCC6
CDC25C	LCK
LCK	NFKBIA
RAF1	LCK
KIT	LCK
LCK	PIK3R1
PIK3CA	LCK
PTPN11	LCK
PTPN6	LCK
MAPK1	LCK
LCK	PRKCD
CD4	LCK
THY1	LCK
NOTCH1	LCK
LCK	STAT1
MAPK3	LCK
PCNA	YBX1
PPP1R15A	PPP1CA
MC1R	POMC
CREBBP	MGMT
EP300	MGMT
FOS	MITF
SUMO1	MITF
GSK3B	MITF
PAX6	MITF
PCNA	CDC25C
MAPK14	CDC25C
PLK1	CDC25C
PLK3	CDC25C
CHEK1	CDC25C
CHEK2	CDC25C
IL12B	IL12A
PTPN6	CXCR4
CD4	CXCR4
CXCL12	CXCR4
SOCS3	CXCR4
AKT1	NOS3
SP1	NOS3
PTPN6	NOS1
CTBP1	NOS1
NFKB1	HMGB1
RELA	HMGB1
RAG1	HMGB1
RB1	HMGB1
AR	HMGB1
CSNK1A1	HMGB1
CASP3	HMGB1
PRKDC	HMGB1
HR	HMGB1
XRCC6	SMAD3
XRCC6	SMAD7
PIK3R1	NFKBIA
SRC	NFKBIA
FOS	NFKB1
PARP1	NFKB1
E2F1	NFKB1
NOTCH1	NFKB1
AR	NFKB1
HMGA2	NFKB1
ATF3	NFKB1
IKBKB	NFKB1
GSK3B	NFKB1
CDK9	NFKB1
MAP3K14	NFKB2
POU2F1	RELA
FOS	RELA
JUN	RELA
SMAD3	EPAS1
TERT	RELA
SP1	RELA
MYC	RELA
NOTCH1	RELA
AR	RELA
SMAD3	FLNA
HMGA2	RELA
EP300	RELA
IKBKB	RELA
BTRC	RELA
CDK9	RELA
PIK3R1	PIK3CA
NPM1	NCL
TERT	NCL
MYB	NCL
PPM1D	NCL
PLK1	NPM1
PARP1	POU2F1
SP1	POU2F1
AR	POU2F1
BARD1	POU2F1
LYN	CD19
ABL1	ABL2
ABL2	GPX1
PIK3R1	CD19
AKT1	BRAF
AKT1	RAF1
AKT1	MDM2
MAPK1	CD19
AKT1	TERT
SRC	AKT1
ABL1	CD19
AKT1	XIAP
AKT1	AR
CASP3	AKT1
AKT1	CHUK
AKT1	CDKN1B
AKT1	MTOR
BTK	CD19
AKT1	MAP2K4
AKT1	PTEN
AKT1	CASP9
ILK	AKT1
AKT1	EP300
AKT1	CHEK1
AKT1	FANCA
RAF1	BRAF
MAP2K2	BRAF
MAPK1	RAF1
RB1	RAF1
RBL2	RAF1
MYC	RAF1
SRC	RAF1
AR	RAF1
BAG1	RAF1
YWHAE	RAF1
PPP1CC	RAF1
PIK3R1	RET
SRC	RET
MMP9	CD44
RB1	MDM2
ABL1	MDM2
AR	MDM2
CDKN2A	MDM2
CCNG1	MDM2
SUMO1	MDM2
EP300	MDM2
MDM4	MDM2
HIF1A	MDM2
ATM	MDM2
SELE	CD44
JUN	FOS
JUND	FOS
MAPK1	FOS
RB1	FOS
EGFR	CD44
FGF2	CD44
PTPN11	MET
SRC	MET
BAG1	MET
LCK	CD44
PIK3R1	ERBB2
SRC	ERBB2
SPP1	CD44
HSP90B1	ERBB2
PTK2	ERBB2
