# Supplementary material for: Identification of Hub Genes Related to the Recovery Phase of Irradiation Injury by Microarray and Integrated Gene Network Analysis
Source: PLoS One. 2011 Sep 13;6(9):e24680. doi: 10.1371/journal.pone.0024680 (PMC3172286; doi:10.1371/journal.pone.0024680)
Supplement: Table S11 — Overlapping gene set obtained by comparing significant differential genes and text-mined genes. (XLS) [file pone.0024680.s012.xls]

## Sheet: Sheet1
Table S11. Overlapping gene set obtained by comparing significant differential genes and text-mined genes
Gene symbol	Gene description	Appear in gene co- expression network	GO terms*
Atf3	activating transcription factor 3		positive regulation of cell proliferation
			regulation of transcription
Ccnd1	cyclin D1		cell cycle/positive regulation of cell proliferation
Cd19	CD19 antigen		B cell receptor signaling pathway
Cdkn1a	cyclin-dependent kinase inhibitor 1A (P21)		cell cycle
			positive regulation of cell proliferation
Chi3l1	chitinase 3-like 1		carbohydrate metabolic process
Col4a1	collagen, type IV, alpha 1		angiogenesis
Cxcl12	chemokine (C-X-C motif) ligand 12		positive regulation of cell proliferation
			immune response/chemotaxis
Egr1	early growth response 1	√	positive regulation of transcription/T cell differentiation
Epor	erythropoietin receptor	√	cytokine-mediated signaling pathway
Fn1	fibronectin 1		acute-phase response/cell-matrix adhesion
Fos	FBJ osteosarcoma oncogene	√	cellular response to extracellular stimulus
			TGF beta receptor signaling pathway
Gadd45a	growth arrest and DNA-damage- inducible 45 alpha	√	cellular response to ionizing radiation
			cell cycle
Gadd45g	growth arrest and DNA-damage- inducible 45 gamma		cell differentiation
			T-helper 1 cell differentiation
Hdac4	histone deacetylase 4	√	negative regulation of cell proliferation
			negative regulation of osteoblast differentiation
Hgf (Met)	hepatocyte growth factor		cell proliferation/myoblast proliferation
Hist1h1c	histone cluster 1, H1c		nucleosome assembly
Hspa5	heat shock protein 5		anti-apoptosis/response to stress
Igf1	insulin-like growth factor 1		anti-apoptosis/Type II pneumocyte differentiation
Igf1r	insulin-like growth factor I receptor		immune response
			negative regulation of protein kinase B signaling cascade
Il12a	interleukin 12a		cell cycle/proliferation
			immune response
Il1b	interleukin 1 beta		activation of MAPK activity/anti-apoptosis
			immune response
Jun	Jun oncogene	√	angiogenesis/negative regulation of cell proliferation
			positive regulation of cell apoptosis
Klf4	Kruppel-like factor 4 (gut)	√	cell differentiation/ stem cell maintenance
			negative regulation of cell proliferation
Mapk3	mitogen-activated protein kinase 3	√	MAPKKK cascade/cell cycle
			response to DNA damage stimulus
Ncam1	neural cell adhesion molecule 1		cell adhesion/cell surface receptor linked signaling pathway
Neil1	nei endonuclease VIII-like 1		DNA repair/response to DNA damage stimulus
Plaur	plasminogen activator, urokinase receptor		negative regulation of gene expression
			negative regulation of apoptosis
Plk3	polo-like kinase 3 (Drosophila)		signal transduction
Pml	promyelocytic leukemia	√	induction of apoptosis/DNA damage response
			myeloid cell differentiation
Prf1	perforin 1 (pore forming protein)		cytolysis
Pten	phosphatase and tensin homolog		angiogenesis/apoptosis/cell migration
Raf1	v-raf-leukemia viral oncogene 1		MAPKKK cascade/apoptosis
Rag1	recombination activating gene 1		B cell differentiation/V(D)J recombination/death
Rhob	ras homolog gene family, member B	√	small GTPase mediated signal transduction/cell differentiation
Sirpa	signal-regulatory protein alpha	√	cell migration/cell-matrix adhesion/phagocytosis, engulfment
Socs3	suppressor of cytokine signaling 3		JAK-STAT cascade/regulation of cell differentiation
Stat1	signal transducer and activator of transcription 1		JAK-STAT cascade/cytokine-mediated signaling pathway
			induction of apoptosis/positive regulation of cell proliferation
Tcrb	T-cell receptor beta chain		/
Thy1	thymus cell antigen 1, theta		T cell receptor signaling pathway/angiogenesis/cell-cell adhesion
Timp2	tissue inhibitor of metalloproteinase 2		negative regulation of cell proliferation
			negative regulation of Ras protein signal transduction
Tnf	tumor necrosis factor		cell apoptosis/activation/proliferation/ defense response
Vwf	Von Willebrand factor homolog		blood coagulation/ cell adhesion
Instruction:
GO terms*	GO term classification is based on PubMed database.
